# Supplementary material
Source: publisher figshare collection journal article supplement (https://acs.figshare.com/ndownloader/files/20178809)
Supplement: Supplementary file 1 [file 20178809]

# Supporting Information

## Universal Scaling Behavior During Network Formation in Controlled Radical Polymerizations

Joseph L. Mann<sup>1</sup>, Rachel L. Rossi<sup>1</sup>, Anton A. A. Smith<sup>1</sup>, and Eric A. Appel<sup>1\*</sup>

<sup>1</sup> *Department of Materials Science and Engineering,  
Stanford University, Stanford CA 94305, USA. Email: eappel@stanford.edu*

### Contents

|          |                                                       |           |
|----------|-------------------------------------------------------|-----------|
| <b>1</b> | <b>Effective Molarity Analysis</b>                    | <b>S2</b> |
| 1.1      | Overlap Concentration ( $c^*$ ) Calculation . . . . . | S2        |
| 1.2      | Derivation and Fitted Data . . . . .                  | S2        |
| <b>2</b> | <b>Polymerization Characterization</b>                | <b>S4</b> |
| 2.1      | Polymerization Kinetics (Linear) . . . . .            | S4        |
| 2.2      | Polymerization Kinetics (Branched) . . . . .          | S5        |
| 2.3      | Polymerization Reactivity Ratios . . . . .            | S6        |
| 2.4      | Characterization Table of Branched Polymers . . . . . | S7        |
| 2.5      | Molecular Weights at Different $DP_{PC}$ . . . . .    | S8        |
| 2.6      | Alternate Scaling Analysis . . . . .                  | S8        |
| <b>3</b> | <b>Rheology</b>                                       | <b>S9</b> |
| 3.1      | Example of Oscillatory Sweep Data . . . . .           | S9        |
| 3.2      | The effect of $DP_{PC}$ on Storage Modulus . . . . .  | S9        |
| 3.3      | Degree of Cure . . . . .                              | S10       |
| 3.4      | Setup . . . . .                                       | S11       |

# 1 Effective Molarity Analysis

## 1.1 Overlap Concentration ( $c^*$ ) Calculation

$$c^* = \frac{\frac{V_m}{N_a}}{R_g^3} = \frac{M * DP}{d * N_a * \left(\frac{b^*(2*DP)^{0.6}}{2.45}\right)^3} \quad (S1)$$

**Table S1:** Overlap Concentrations for DMA at varying DPs

|          | DP 25 | DP 50 | DP 100 |
|----------|-------|-------|--------|
| wt %     | 20.7  | 11.9  | 6.8    |
| Molarity | 2.1   | 1.2   | .7     |

## 1.2 Derivation and Fitted Data

Crosslink efficiency (XLE) is defined as the propensity of a crosslink over a loop. An XLE of 1 indicates no loop formation while an XLE of 0.5 indicates equal formation of crosslinks and loops. Therefore we treat XLE in equation S2.

$$XLE = \frac{rate_{crosslink}}{rate_{crosslink} + rate_{loop}} \quad (S2)$$

Crosslinking is a bimolecular reaction while loop formation is unimolecular. We then transform this equation into S3.

$$XLE = \frac{k_{xl}[p^*][x-linker]}{k_{xl}[p^*][x-linker] + k_l[EM]} \quad (S3)$$

Effective Molarity (EM) is defined as the the rate of loop formation over crosslink formation, and simultaneously used as a molarity for a unimolecular reaction. Higher effective molarities lead to lower XLE.

$$EM = \frac{k_l}{k_{xl}} \quad (S4)$$

And therefore\* :

$$XLE = \frac{1}{1 + \frac{[EM]^2}{[p^*][x-linker]}} \quad (S5)$$

F-S Ideality implies macroscopic gelation when.

$$\frac{[MVM]_{GP}}{[CTA]} = \frac{1}{2} \quad (S6)$$

However this ignored the formation of intramolecular loops. We can rearrange the equation to solve for the XLE

$$XLE = \frac{1}{2} * \frac{[CTA]}{[MVM]_{GP}} \quad (S7)$$

We approximate  $[p^*]$  to be [Radical Initiator]. We experimentally measure  $[MVM]_{GP}$  values as a function of [DMA]. This affords us the ability to solve for [EM] as a function of  $\frac{[MVM]_{GP}}{[CTA]}$  for each DP. The experimentally measured  $[MVM]_{GP}$  are listed below in SI Table 2. We plot [EM] as a function of  $\frac{[MVM]_{GP}}{[CTA]}$  in SI Figure 1, which were fit linearly.

\* We approximate  $[p]^*$  as the concentration of radical initiators due to the difficulty in calculating this value.

**Table S2:** Experimentally measured  $[MVM]_{GP}$  and derived  $[EM]$  for DMA at DP 25, 50, 100 at  $[DMA] = 1, 1.75, 2.5, 3.5,$  and  $5M$  when utilizing MBAM as the MVM

| $[DMA]$ | $[MVM]_{GP}/[CTA]$ |       |        | $[EM]$ |       |        |
|---------|--------------------|-------|--------|--------|-------|--------|
|         | DP 25              | DP 50 | DP 100 | DP 25  | DP 50 | DP 100 |
| 1       | 4.5                | 5.5   | 5.5    | 107    | 66    | 33     |
| 1.75    | 2.6                | 2.8   | 3.0    | 103    | 56    | 30     |
| 2.5     | 2.5                | 2.5   | 2.5    | 97     | 48    | 24     |
| 3.5     | 1.4                | 1.4   | 1.4    | 99     | 50    | 25     |
| 5       | 1.1                | 1.1   | 1.1    | 102    | 51    | 26     |

**Effective Molarity as a function of DP and  $[MVM]_{GP}/[CTA]$  for DMA**

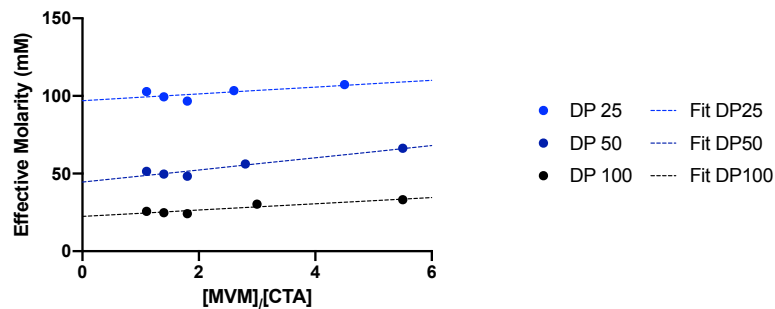

**Figure S1:** Effective Molarities plotted as a function of  $\frac{[MVM]}{[CTA]}$  for polymerizations of DMA and MBAM at DP 25, 50, and 100 with a linear fit plotted over the data.

This analysis allows us to solve  $[MVM]_{GP}$  as a function of  $[DMA]$  for each DP by solving equation S8, which is used in Figure 2A

$$XLE(DP, [DMA], \frac{[MVM]_{GP}}{[CTA]}) * \frac{[MVM]_{GP}}{[CTA]} = \frac{1}{2} \quad (S8)$$

## 2 Polymerization Characterization

### 2.1 Polymerization Kinetics (Linear)

Polymerization rate constants were determined for the RAFT polymerization of MORPH, DMA, NIPAM, and MPAM in DMF at 60°C targeting a DP of 100 at [VM] = 3.5M. A typical polymerization is as follows. DMA (1.39 g, 100 eq, 14 mmol, filtered through basic alumina), 2-CPDT(48.4 mg , 1eq, 0.14 mmol), and AIBN (4.6 mg, 0.2 eq, 0.028 mmol) with trioxane as an internal standard were combined and diluted until 4mL in DMF. The reaction was distributed evenly into multiple 8 ml scintillation vials fitted with PTFE septa. Each separate vial was purged with nitrogen gas for 15 minutes polymerized at 60°C for different reaction times (60, 90, 150, 240, 360 min). When the timepoint was reached the vial was exposed to air, chilled in an ice bath, and subjected to  $^1\text{H}$  NMR spectroscopy in  $\text{CDCl}_3$ . The pre and post polymerization ratios of  $\frac{[\text{trioxane}]}{[\text{DMA}]}$  ((trioxane,  $\delta = 5.08$ , s) and the VMs were used to determine the degree of conversion.

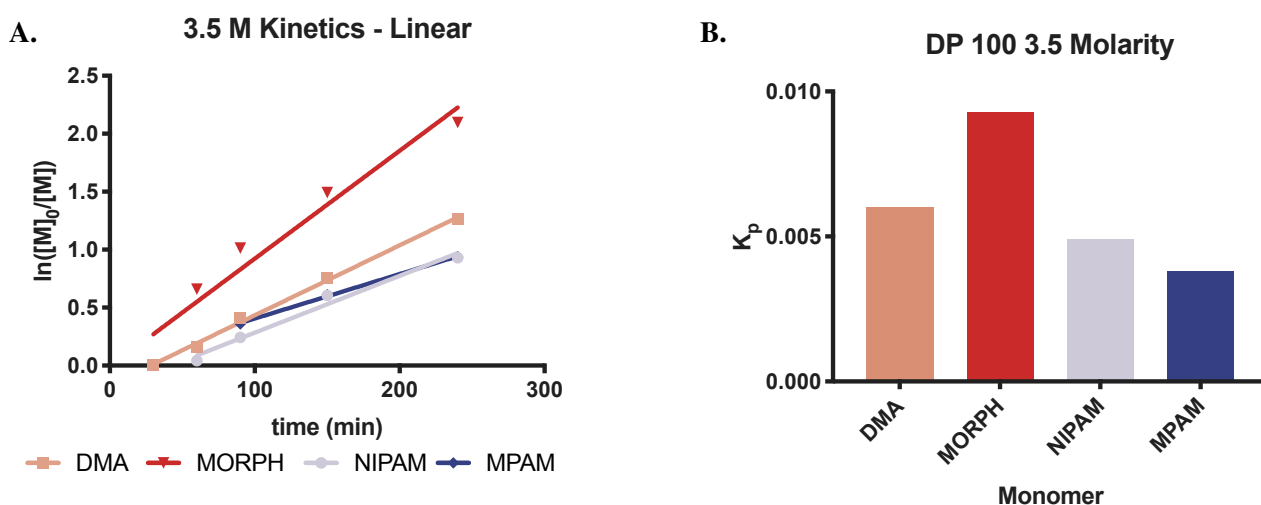

**Figure S2:** **A.** Monomer Consumption for the RAFT polymerization of MORPH, DMA, NIPAM, and MPAM in DMF at 60°C targeting a DP of 100 at [VM] = 3.5M. **B.** Slopes of the lines from A. to show the difference in polymerization kinetics for the different acrylamide derivative vinyl monomers.



## 2.2 Polymerization Kinetics (Branched)

The controlled growth of primary chains was confirmed for the RAFT copolymerization of NIPAM, and MBAM in DMF at 60°C targeting a DP of 50 at [VM] = 3M. A typical polymerization is as follows. NIPAM (1.750, 50 eq, 15.4 mmol), 2-CPDT(106.5 mg, 1 eq, 0.31 mmol), and AIBN (10.2 mg, 0.2 eq, 0.062 mmol) were combined and diluted until 5mL in DMF and transferred into a 20 mL scintillation vials fitted with a PTFE septa. The vial was purged with nitrogen gas for 15 minutes and polymerized at 60°C. Aliquots were removed at different reaction times under positive nitrogen pressure and subjected to  $^1\text{H}$  NMR spectroscopy in  $\text{CDCl}_3$  and Size Exclusion Chromatography (SEC) in DMF using PEG standards. NIPAM conversion was determined by the disappearance of NIPAM vinyl peaks ( $\delta = 5.57$ , d) compared to DMF ( $\delta = 7.97$ , s) as an internal standard.

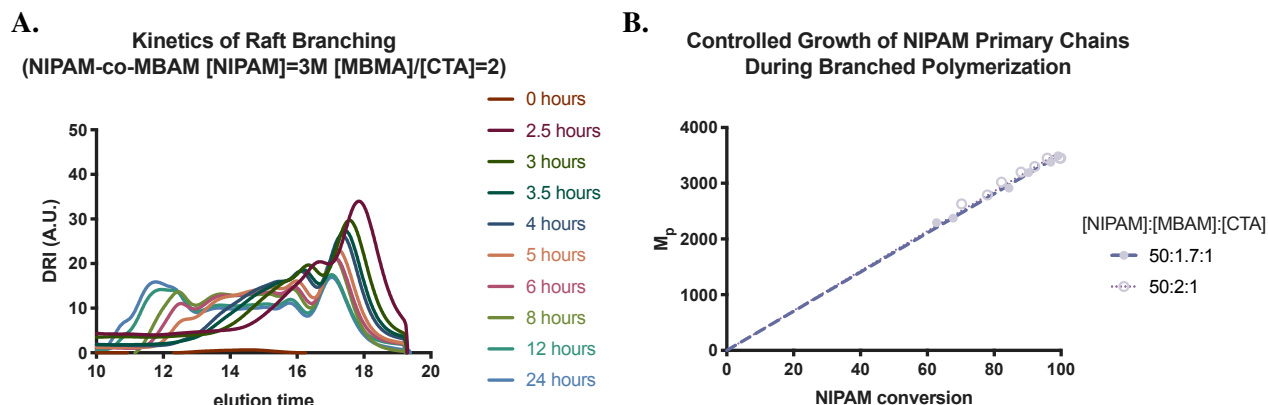

**Figure S3:** Kinetic experiment exploring the controlled nature of chain growth during the following polymerizations. **A.** Size Exclusion Chromatograms of the RAFT copolymerization of NIPAM and MBAM at [NIPAM] = 3M at 60°C at a  $\frac{[\text{MBAM}]}{[\text{CTA}]}$  ratio of 2:1. The SEC RI traces are normalized to have equal AUCs. **B.**  $M_n$  values of the primary chain (right-most peak in part A) determined by DMF SEC with the use of PEG standards as a function of NIPAM conversion indicating controlled primary chain growth during branching.

## 2.3 Polymerization Reactivity Ratios

Polymerization reactivity ratios were determined for NIPAM and DMA, and DMA and MORPH through RAFT polymerization in DMF at 60°C [VM] = 3.5M. A brief experimental design to determine reactivity ratios for NIPAM and DMA is as follows. Three copolymerization ratios (75% DMA and 25% NIPAM, 50% DMA and 50% NIPAM, 25% DMA and 50% NIPAM) are prepared separately. Each copolymerization is split up into 4 separate reaction vials and polymerized to different global conversions. We measure the monomer conversion via  $^1\text{H}$  NMR spectroscopy in  $\text{CDCl}_3$  of DMA and NIPAM as a function of global monomer conversion and solve for the reactivity ratios through nonlinear regression of the Meyer Lowry method. A typical reaction procedure is as follows. DMA (521 mg, 50 eq, 5.25 mmol, filtered through basic alumina), NIPAM (594 mg, 50 eq, 5.25 mmol), 2-CPDT(36.3 mg, 1eq, 0.105 mmol), and AIBN (3.5 mg, 0.2 eq, 0.021 mmol) were combined and diluted until 3mL in DMF. The reaction was distributed evenly into three 8 ml scintillation vials fitted with PTFE septa. Each separate vial was purged with nitrogen gas for 15 minutes polymerized at 60°C for either 60, 120, or 180 minutes. The disappearance of vinyl peaks of DMA ( $\delta = 5.56$ , d) and NIPAM ( $\delta = 5.535$ , d) compared to DMF ( $\delta = 7.97$ , s) as an internal standard were used to determine monomer conversion via  $^1\text{H}$  NMR spectroscopy in  $\text{CDCl}_3$ .

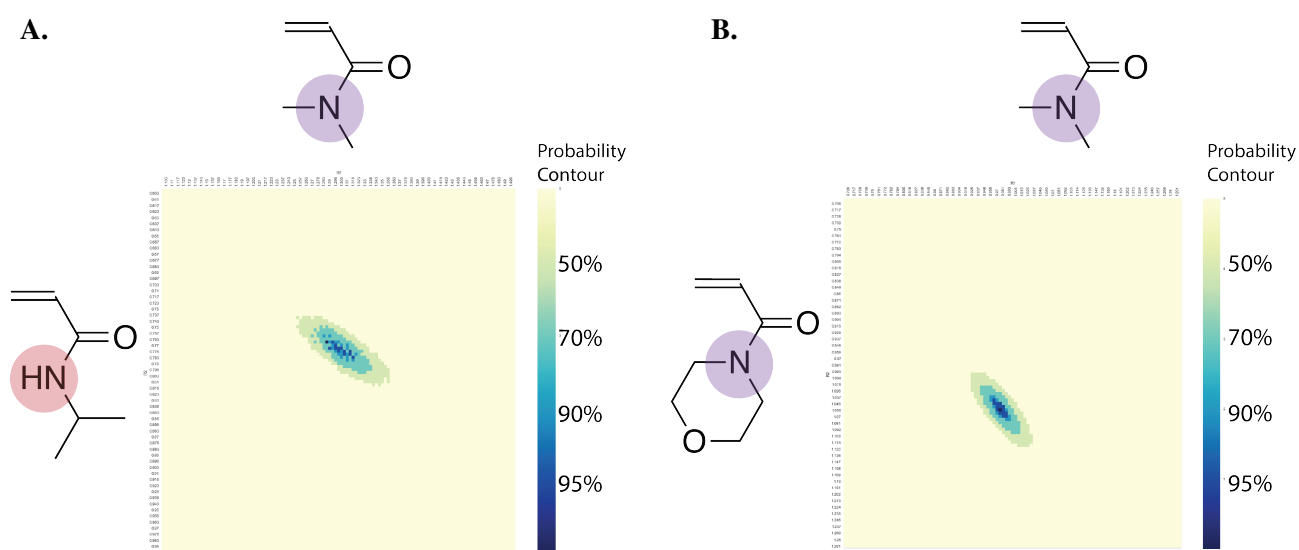

**Figure S4:** Reactivity ratio heat-maps for the copolymerization of **A.** DMA and NIPAM and **B.** DMA and MORPH calculated using the Meyer-Lowry method. Heat-map values correspond to probability contours fitting these reactivity ratios to the experimentally derived conversions compared to best fit (darkest dot). A probability contour of 95% indicates that, statistically, there is a 5% chance that this value has a different sum of squared errors than the global minimum. Color coding on vinyl monomers correspond to acrylamide class as secondary (red) or tertiary (purple).

**Table S3:** Reactivity Ratio calculated for the copolymerization of DMA and NIPAM and DMA and MORPH using the Meyer-Lowry method.

| Monomer A | $r_A$ | Monomer B | $r_B$ |
|-----------|-------|-----------|-------|
| DMA       | 1.29  | NIPAM     | 0.77  |
| DMA       | 0.98  | MORPH     | 1.06  |

## 2.4 Characterization Table of Branched Polymers

**Table S4:** Table of relevant characterization data for branched copolymers synthesized during this study.

| Time | % Conversion <sup>a</sup> | DP  | VM    | [VM] | MVM    | $\frac{[MVM]}{[CTA]}$ | $\frac{[MVM]_{GP}}{[CTA]}$ | M <sub>p</sub> <sup>b</sup> | M <sub>n</sub> <sup>c</sup> | M <sub>w</sub> <sup>c</sup> | $\frac{M_n}{M_p}$ | $\frac{M_w}{M_p}$ | $\frac{[MVM]}{[MVM]_{GP}}$ |
|------|---------------------------|-----|-------|------|--------|-----------------------|----------------------------|-----------------------------|-----------------------------|-----------------------------|-------------------|-------------------|----------------------------|
| 24   | 99%+                      | 50  | MORPH | 2.5  | MBAM   | 0.25                  | 1.8                        | 8.5                         | 8.75                        | 13.1                        | 1.02              | 1.54              | 0.14                       |
| 24   |                           | 50  | MORPH | 2.5  | MBAM   | 0.5                   | 1.8                        | 8.5                         | 10                          | 15.6                        | 1.17              | 1.83              | 0.28                       |
| 24   |                           | 50  | MORPH | 2.5  | MBAM   | 0.75                  | 1.8                        | 8.5                         | 13.3                        | 23.9                        | 1.56              | 2.81              | 0.42                       |
| 24   |                           | 50  | MORPH | 2.5  | MBAM   | 1                     | 1.8                        | 8.5                         | 15.2                        | 38.6                        | 1.78              | 4.54              | 0.56                       |
| 24   |                           | 50  | MORPH | 2.5  | MBAM   | 1.3                   | 1.8                        | 8.5                         | 24.9                        | 97                          | 2.92              | 11.4              | 0.72                       |
| 24   |                           | 50  | MORPH | 2.5  | MBAM   | 1.5                   | 1.8                        | 8.5                         | 34.2                        | 198                         | 4.02              | 23.3              | 0.83                       |
| 24   |                           | 50  | MORPH | 2.5  | MBAM   | 1.7                   | 1.8                        | 8.5                         | 96.4                        | 393                         | 11.3              | 46.2              | 0.94                       |
| 24   |                           | 50  | MORPH | 3.5  | MBAM   | 0.25                  | 1.4                        | 8.2                         | 9.4                         | 11.3                        | 1.14              | 1.38              | 0.18                       |
| 24   | 99%+                      | 50  | MORPH | 3.5  | MBAM   | 0.5                   | 1.4                        | 8.2                         | 11.4                        | 18.2                        | 1.39              | 2.22              | 0.36                       |
| 24   |                           | 50  | MORPH | 3.5  | MBAM   | 0.75                  | 1.4                        | 8.2                         | 13.4                        | 29.1                        | 1.63              | 3.54              | 0.54                       |
| 24   |                           | 50  | MORPH | 3.5  | MBAM   | 0.9                   | 1.4                        | 8.2                         | 14.8                        | 45                          | 1.80              | 5.48              | 0.64                       |
| 24   |                           | 50  | MORPH | 3.5  | MBAM   | 1                     | 1.4                        | 8.2                         | 22                          | 86.8                        | 2.68              | 10.58             | 0.71                       |
| 24   |                           | 50  | MORPH | 3.5  | MBAM   | 1.2                   | 1.4                        | 8.2                         | 49.3                        | 246.9                       | 6.01              | 30.11             | 0.86                       |
| 24   |                           | 50  | MORPH | 3.5  | MBAM   | 1.3                   | 1.4                        | 8.2                         | 583                         | 1197                        | 71.1              | 145.6             | 0.93                       |
| 24   |                           | 50  | MORPH | 2.5  | PIPBAM | 0.25                  | 1.4                        | 8                           | 9                           | 11.8                        | 1.12              | 1.47              | 0.18                       |
| 24   |                           | 50  | MORPH | 2.5  | PIPBAM | 0.5                   | 1.4                        | 8.7                         | 13                          | 21.7                        | 1.49              | 2.49              | 0.36                       |
| 24   | 99%+                      | 50  | MORPH | 2.5  | PIPBAM | 0.75                  | 1.4                        | 8.7                         | 18.1                        | 34                          | 2.08              | 3.91              | 0.54                       |
| 24   |                           | 50  | MORPH | 2.5  | PIPBAM | 1                     | 1.4                        | 8.7                         | 25.8                        | 53.3                        | 2.97              | 6.13              | 0.71                       |
| 24   |                           | 50  | MORPH | 2.5  | PIPBAM | 1.25                  | 1.4                        | 8.7                         | 153.2                       | 244.9                       | 17.6              | 28.1              | 0.89                       |
| 24   |                           | 50  | MPAM  | 2.5  | PIPBAM | 0.25                  | 1.4                        | 7.2                         | 9.5                         | 13                          | 1.31              | 1.81              | 0.18                       |
| 24   |                           | 50  | MPAM  | 2.5  | PIPBAM | 0.5                   | 1.4                        | 7.2                         | 15.2                        | 21.6                        | 2.11              | 3                 | 0.36                       |
| 24   |                           | 50  | MPAM  | 2.5  | PIPBAM | 0.75                  | 1.4                        | 7.2                         | 18.9                        | 33.9                        | 2.63              | 4.71              | 0.54                       |
| 24   |                           | 50  | MPAM  | 2.5  | PIPBAM | 1                     | 1.4                        | 7.2                         | 23.1                        | 77                          | 3.21              | 10.7              | 0.71                       |
| 24   |                           | 50  | MPAM  | 2.5  | MBAM   | 0.5                   | 3.2                        | 6.9                         | 7.3                         | 9                           | 1.05              | 1.3               | 0.16                       |
| 24   | 99%+                      | 50  | MPAM  | 2.5  | MBAM   | 0.75                  | 3.2                        | 7.9                         | 9.9                         | 17.3                        | 1.25              | 2.19              | 0.23                       |
| 24   |                           | 50  | MPAM  | 2.5  | MBAM   | 1.5                   | 3.2                        | 7.9                         | 13.3                        | 26.4                        | 1.68              | 3.34              | 0.47                       |
| 24   |                           | 50  | MPAM  | 2.5  | MBAM   | 2.4                   | 3.2                        | 7.9                         | 23.2                        | 115.8                       | 2.94              | 14.65             | 0.75                       |
| 24   |                           | 50  | MPAM  | 2.5  | MBAM   | 2.8                   | 3.2                        | 7.9                         | 43.9                        | 350.2                       | 5.55              | 44.3              | 0.88                       |
| 24   |                           | 50  | MPAM  | 3.5  | MBAM   | 0.25                  | 2                          | 6.5                         | 5.8                         | 7.3                         | 0.89              | 1.12              | 0.13                       |
| 24   |                           | 50  | MPAM  | 3.5  | MBAM   | 0.5                   | 2                          | 7.5                         | 8.6                         | 11.9                        | 1.14              | 1.58              | 0.25                       |
| 24   |                           | 50  | MPAM  | 3.5  | MBAM   | 0.75                  | 2                          | 7.5                         | 8                           | 16.1                        | 1.06              | 2.15              | 0.38                       |
| 24   |                           | 50  | MPAM  | 3.5  | MBAM   | 1                     | 2                          | 7.5                         | 9.5                         | 15.8                        | 1.25              | 2.10              | 0.5                        |
| 24   | 99%+                      | 50  | MPAM  | 3.5  | MBAM   | 1.5                   | 2                          | 7.5                         | 20.5                        | 65.2                        | 2.73              | 8.69              | 0.75                       |
| 24   |                           | 50  | MPAM  | 3.5  | MBAM   | 1.8                   | 2                          | 7.5                         | 21.4                        | 94.5                        | 2.85              | 12.6              | 0.9                        |
| 24   |                           | 50  | DMA   | 2.5  | MBAM   | 0.25                  | 1.8                        | 5.6                         | 6.1                         | 7.7                         | 1.09              | 1.35              | 0.14                       |
| 24   |                           | 50  | DMA   | 2.5  | MBAM   | 0.5                   | 1.8                        | 5.6                         | 7.1                         | 10.1                        | 1.27              | 1.80              | 0.28                       |
| 24   |                           | 50  | DMA   | 2.5  | MBAM   | 0.75                  | 1.8                        | 5.6                         | 8.7                         | 14.6                        | 1.55              | 2.61              | 0.42                       |
| 24   |                           | 50  | DMA   | 2.5  | MBAM   | 1.6                   | 1.8                        | 5.6                         | 62                          | 344.1                       | 11.1              | 61.4              | 0.89                       |
| 24   |                           | 50  | DMA   | 2.5  | MBAM   | 1.7                   | 1.8                        | 5.6                         | 109.3                       | 482.7                       | 19.5              | 86.2              | 0.94                       |
| 24   |                           | 50  | DMA   | 3.5  | MBAM   | 0.25                  | 1.4                        | 5.9                         | 7.2                         | 9.9                         | 1.22              | 1.67              | 0.18                       |
| 24   | 99%+                      | 50  | DMA   | 3.5  | MBAM   | 0.5                   | 1.4                        | 5.9                         | 8.0                         | 12.6                        | 1.35              | 2.13              | 0.36                       |
| 24   |                           | 50  | DMA   | 3.5  | MBAM   | 0.75                  | 1.4                        | 5.9                         | 11                          | 22.1                        | 1.86              | 3.74              | 0.54                       |
| 24   |                           | 50  | DMA   | 3.5  | MBAM   | 0.9                   | 1.4                        | 5.9                         | 15.6                        | 40.8                        | 2.65              | 6.91              | 0.64                       |
| 24   |                           | 50  | DMA   | 3.5  | MBAM   | 1                     | 1.4                        | 5.9                         | 19.4                        | 61.8                        | 3.3               | 10.5              | 0.71                       |
| 24   |                           | 50  | DMA   | 3.5  | MBAM   | 1.2                   | 1.4                        | 5.9                         | 42.5                        | 217.6                       | 7.2               | 36.9              | 0.86                       |
| 24   |                           | 50  | DMA   | 5    | MBAM   | 0.25                  | 1.1                        | 5.8                         | 6.9                         | 9.3                         | 1.19              | 1.60              | 0.23                       |
| 24   |                           | 50  | DMA   | 5    | MBAM   | 0.5                   | 1.1                        | 5.8                         | 9.1                         | 16.4                        | 1.56              | 2.82              | 0.45                       |
| 24   |                           | 50  | DMA   | 5    | MBAM   | 0.75                  | 1.1                        | 5.8                         | 14.9                        | 42.7                        | 2.56              | 7.36              | 0.68                       |
| 24   | 99%+                      | 50  | DMA   | 5    | MBAM   | 0.9                   | 1.1                        | 5.8                         | 36.7                        | 206.2                       | 6.33              | 35.55             | 0.82                       |
| 24   |                           | 50  | DMA   | 5    | MBAM   | 1                     | 1.1                        | 5.8                         | 172                         | 476                         | 29.7              | 82                | 0.91                       |
| 24   |                           | 25  | DMA   | 3.5  | MBAM   | 0.25                  | 1.4                        | 3.0                         | 3.1                         | 4.2                         | 1.03              | 1.4               | 0.18                       |
| 24   |                           | 25  | DMA   | 3.5  | MBAM   | 0.5                   | 1.4                        | 3.0                         | 4.4                         | 7.7                         | 1.46              | 2.6               | 0.36                       |
| 24   |                           | 25  | DMA   | 3.5  | MBAM   | 0.75                  | 1.4                        | 3.0                         | 6.4                         | 15.8                        | 2.13              | 5.3               | 0.54                       |
| 24   |                           | 25  | DMA   | 3.5  | MBAM   | 1                     | 1.4                        | 3.0                         | 13.7                        | 58.4                        | 4.56              | 19.5              | 0.71                       |
| 24   |                           | 25  | DMA   | 3.5  | MBAM   | 1.25                  | 1.4                        | 3.0                         | 461                         | 752                         | 153               | 250               | 0.89                       |
| 24   |                           | 100 | DMA   | 3.5  | MBAM   | 0.3                   | 1.4                        | 13.3                        | 17.6                        | 24.7                        | 1.32              | 1.85              | 0.21                       |
| 24   | 99%+                      | 100 | DMA   | 3.5  | MBAM   | 0.6                   | 1.4                        | 11.1                        | 16.2                        | 25.8                        | 1.46              | 2.32              | 0.43                       |
| 24   |                           | 100 | DMA   | 3.5  | MBAM   | 0.9                   | 1.4                        | 11.1                        | 24.2                        | 53.6                        | 2.18              | 4.82              | 0.64                       |
| 24   |                           | 100 | DMA   | 3.5  | MBAM   | 1.2                   | 1.4                        | 11.1                        | 125                         | 528                         | 11.26             | 47.57             | 0.86                       |

<sup>a</sup> Conversion determined via the post polymerization ratio of unconsumed VM (DMA ( $\delta = 6.47$ , q), MORPH ( $\delta = 6.43$ , q), and MPAM( $\delta = 5.58$ , d)) vinyl peak to the integrated polymerization signal via <sup>1</sup>H NMR spectroscopy. Due to the similarity in polymerization conditions and a kinetics

experiment completed we assume >99% for all other experiments.

<sup>b</sup> Absolute  $M_p$  determined via Multi Angle Laser Light Scattering and is reported as the Molecular Weight determined at the apex of primary chain elution volume. Units are kDa.

<sup>c</sup> Absolute  $M_n$  and  $M_w$  determined via Multi Angle Laser Light Scattering through integration of the entire chromatogram (primary chains included). Units are kDa.

## 2.5 Molecular Weights at Different $DP_{PC}$ s

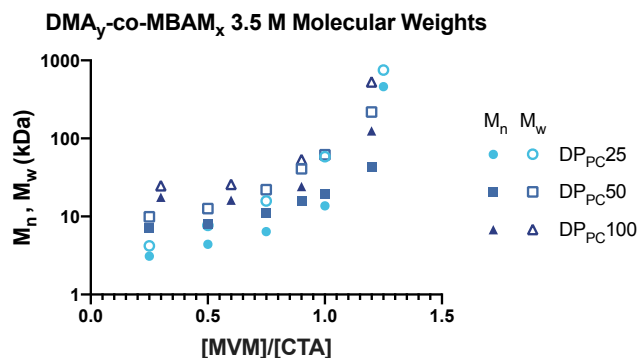

**Figure S5:** Number and weight average molecular weight scaling for DMA branched polymers copolymerized with MBAM at  $DP_{PC}$  25, 50, and 100.

## 2.6 Alternate Scaling Analysis

Traditional polymer physics looks at the phenomena of percolation through scaling of  $\epsilon$  rather than  $\frac{[MVM]}{[MVM]_{GP}}$ , where  $\epsilon$  is the relative extent of reaction defined as  $\frac{[MVM] - [MVM]_{GP}}{[MVM]_{GP}}$ . We plot our data as a function of  $\epsilon$  in SI Figure 6.

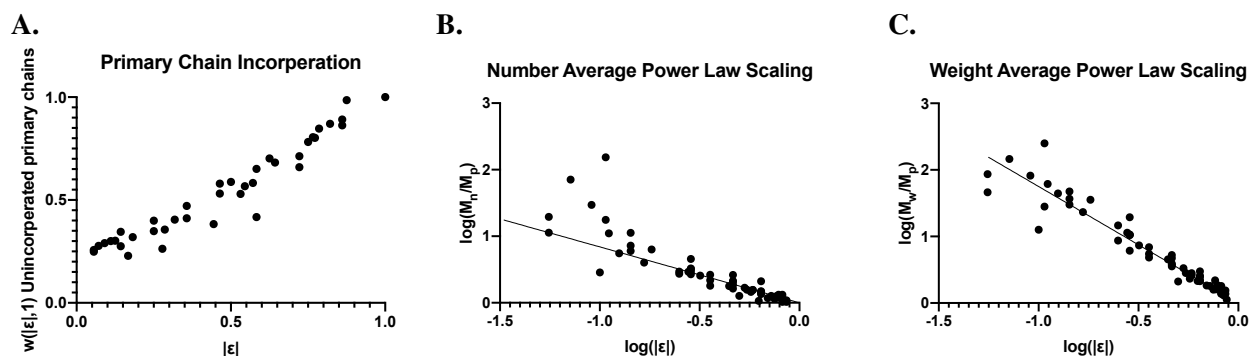

**Figure S6:** Three alternate plots of the scaling determined through our analysis where primary chain incorporation (A.), number average (B.) and weight average (C.) scaling are plotted as a function of  $\epsilon$ . The slopes in B (-0.84) and C (-1.7) correspond to the exponent described in the main text's equation 4.

### 3 Rheology

#### 3.1 Example of Oscillatory Sweep Data

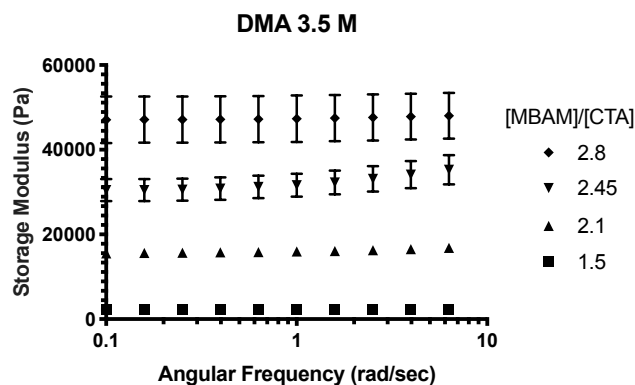

**Figure S7:** Shear storage modulus determined by oscillatory sweep ( $\epsilon = 0.01$ ) for the copolymerization of DMA (3.5 M) and MBAM targeting a  $\frac{[DMA]}{[CTA]} = 50$  at  $\frac{[MBAM]}{[CTA]}$  of 1.5, 2.1, 2.45, and 2.8.  $n=3$  for two sections of gel for each measurement (6 measurements).

#### 3.2 The effect of $DP_{PC}$ on Storage Modulus

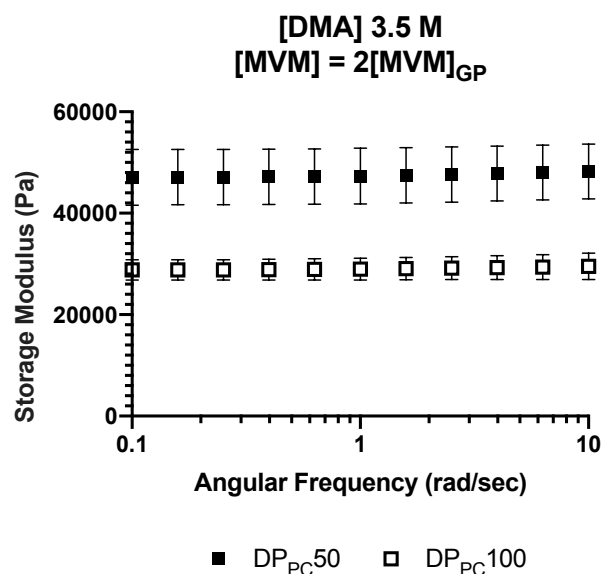

**Figure S8:** Shear storage modulus determined by oscillatory sweep ( $\epsilon = 0.01$ ) for the copolymerization of DMA (3.5 M) and MBAM targeting a  $\frac{[DMA]}{[CTA]} = 50$  at  $\frac{[MBAM]}{[CTA]}$  of 2.8.  $n=3$  for two sections of gel for each measurement (6 measurements).

### 3.3 Degree of Cure

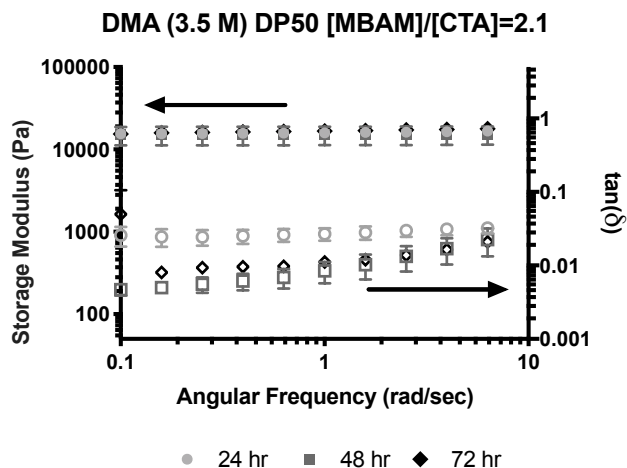

**Figure S9:** Shear storage modulus and  $\tan(\delta)$  determined by oscillatory sweep ( $\epsilon = 0.01$ ) for the copolymerization of DMA (3.5 M) and MBAM targeting a  $\frac{[\text{MBAM}]}{[\text{CTA}]} = 2.1$  and  $\frac{[\text{DMA}]}{[\text{CTA}]} = 50$  for 24, 48, and 72 hours. Identical oscillatory shear moduli for the three timepoints indicative of a full cure at 24 hrs.  $\frac{[\text{MVM}]_{\text{GP}}}{[\text{CTA}]}$  for  $[\text{DMA}] = 3.5\text{M}$  is 1.4.  $n=3$  for each measurement.

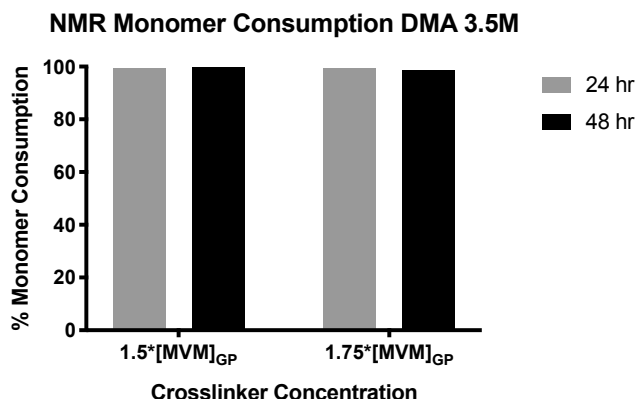

**Figure S10:** Vinyl Monomer consumption during the copolymerization of DMA (3.5 M) and MBAM targeting  $\frac{[\text{DMA}]}{[\text{CTA}]} = 50$  and  $\frac{[\text{MBAM}]}{[\text{CTA}]} = 2.1$  ( $1.5 * [\text{MVM}]_{\text{GP}}$ ) and  $\frac{[\text{MBAM}]}{[\text{CTA}]} = 2.45$  ( $1.75 * [\text{MVM}]_{\text{GP}}$ ) for cures of 24hrs and 48 hours. Vinyl Monomer consumption determined by addition of a 1,3,5-trioxane (as an internal standard) to reaction mixture before polymerization, performing a  $^1\text{H}$  NMR of the reaction mixture before polymerization, swelling a section of gel in an excess of  $\text{CDCl}_3$  for 48 hours with agitation, and performing a  $^1\text{H}$  NMR of the resulting  $\text{CDCl}_3$ . The pre and post polymerization ratios of  $\frac{[\text{trioxane}]}{[\text{DMA}]}$  ((trioxane,  $\delta = 5.08$ , s) and (DMA,  $\delta = 6.54$ , q)) was used to determine the degree of conversion ( $\text{Conversion} = \frac{\text{pre} - \text{post}}{\text{pre}}$ ). Very similar conversion are calculated when DMF ( $\delta = 7.97$ , s) is employed as an internal standard. Actual conversion for  $1.5 * [\text{MVM}]_{\text{GP}}$  at 24 and 48 hours are, respectively, 99.2, and 99.9. Actual conversion for  $1.75 * [\text{MVM}]_{\text{GP}}$  at 24 and 48 hours are, respectively, 99.4, and 98.7, which we believe is within experimental error.

### 3.4 Setup

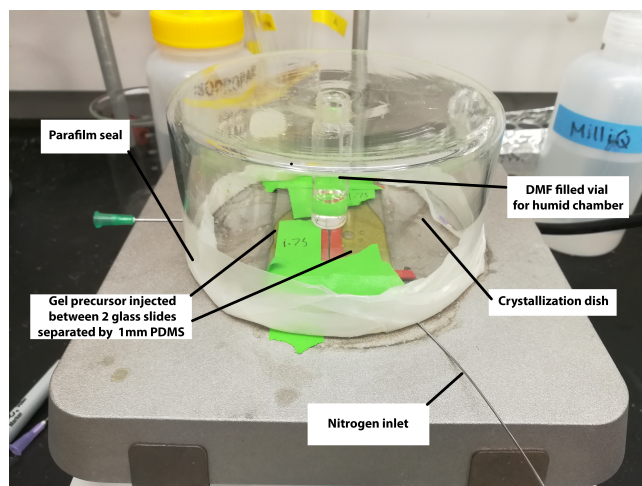

**Figure S11:** Gelation setup immediately after injecting RAFT gel precursor between the glass slides. During 24 hr polymerization the Nitrogen inlet and outlet are removed.
